# Supplementary material for: Mangroves as nature-based mitigation for ENSO-driven compound flood risks in a river delta
Source: Copernicus journal article supplement (doi:10.5194/egusphere-2023-1009), 2023-08-07
Supplement: Supplementary file [file egusphere-2023-1009-RC2-supplement.pdf]

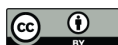

## ***Mangroves as nature-based mitigation for ENSO-driven compound flood risks in a river delta***

Ignace Pelckmans<sup>1</sup>, Jean-Philippe Belliard<sup>1,2</sup>, Olivier Gourgue<sup>1,3,2</sup>, Luis E. Dominguez-Granda<sup>4</sup>, Stijn Temmerman<sup>1</sup>,

<sup>1</sup>ECOSPHERE, University of Antwerp, Department of Biology, Antwerp, Belgium

<sup>2</sup>Royal Belgian Institute of Natural Sciences, Brussels, Belgium

5 <sup>3</sup>Department of Earth and Environment, Boston University, Boston, MA, USA

<sup>4</sup>Centro del Agua y Desarrollo Sostenible, Escuela Superior Politecnica del Litoral (ESPOL), Facultad de Ciencias Naturales y Matematicas, Guayaquil, Ecuador

*Correspondence to:* Ignace Pelckmans (ignace.pelckmans@uantwerpen.be)

10 **Abstract.** Densely populated coastal river deltas are very vulnerable to compound flood risks, coming from both oceanic and riverine sources. Climate change may increase these compound flood risks due to sea level rise and intensifying precipitation events. Here, we investigate to what extent nature-based flood defence strategies, through conservation of mangroves in a tropical river delta, can contribute to mitigate the oceanic and riverine components of compound flood risks. While current knowledge of estuarine compound flood risks is mostly focussed on short-term events such as storm surges (taking one or a few days), longer-term events, such as El Niño events (continuing for several weeks to months) along the Pacific coast of Latin America, are understudied. Here, we present a hydrodynamic modelling study of a large river delta in Ecuador aiming to elucidate the compound effects of El Niño driven oceanic and riverine forcing on extreme high water level propagation through the delta, and in particular, the role of mangroves in reducing the compound high water levels. Our results show that the deltaic high water level anomalies are predominantly driven by the oceanic forcing but that the riverine forcing causes the anomalies to amplify upstream. Furthermore, mangroves in the delta attenuate part of the oceanic contribution to the high water level anomalies, with the attenuating effect increasing in the landward direction, while mangroves have a negligible effect on the riverine component. These findings show that mangrove conservation and restoration programs can contribute to nature-based mitigation, especially the oceanic component of compound flood risks in a tropical river delta.

15  
20

### **1 Introduction**

25 Extreme sea levels (ESLs) are an enormous threat to coastal areas and are expected to increase in intensity and frequency due to climate change (Fox-Kemper et al., 2021; Tebaldi et al., 2021; Vousdoukas et al., 2018). ESLs typically occur when high tides coincide with surges, such as storm surges, which typically last for one or a few single high tides, or interannual climate fluctuations, such as El Niño events, which could last multiple months or years (Muis et al., 2016; Barnard et al., 2015). The flood hazards that these ESLs can cause might be intensified due to the co-occurrence of extreme river discharge events in

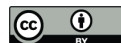

30 estuaries and coastal deltas (Bevacqua et al., 2019; Wahl et al., 2015). As coastal areas typically host densely populated cities, ESLs are estimated to affect 5 % of the global population and 10 % of global gross domestic product by 2100 if no protective measures are taken (Hinkel et al., 2014). Consequently, in the face of continued climate warming and growing impacts of ESLs, the need for sustainable coastal defence strategies is globally increasing. As a complement to expensive engineered flood defence systems, nature-based solutions, such as the conservation and restoration of natural coastal wetlands, are being  
35 more and more recognized as to improve the sustainability of strategies to mitigate ESL-driven flood risks (Narayan et al., 2016; Temmerman et al., 2013, 2023).

The El Niño-Southern Oscillation (ENSO) is one of the most dominant interannual climate fluctuations on Earth that generates ESLs across the Pacific Ocean (Colas et al., 2008; Barnard et al., 2015; Widlansky et al., 2015; Chang et al., 2013). During  
40 the neutral phase of ENSO, westward trade winds pile up warm surface waters in the western Pacific causing the upwelling of colder waters in the eastern Pacific in front of the Pacific coast of Latin America. During the warm phase of ENSO, referred to as El Niño, weakened trade winds reduce the upwelling of colder waters and therefore lead to warmer surface waters in the eastern Pacific (McPhaden et al., 2006). These positive sea surface temperature anomalies (SSTAs) trigger atmospheric convection, which further weakens the trade winds and reinforces the surface water warming (Timmermann et al., 2018).  
45 Likewise, the unusual warm surface waters cause sea levels to increase through thermal expansion (Nerem et al., 1999), with sea level anomalies (SLAs) up to +40 cm in front of the Ecuadorian and Peruvian coasts, here further referred to as the oceanic forcing on El Niño-driven ESLs (Belliard et al., 2021; Colas et al., 2008). Meanwhile, the increased atmospheric convection leads to increased precipitation, and hence increased river discharge in coastal Ecuador and Northern-Peru, here further referred to as the riverine forcing on El Niño-driven ESLs (Takahashi, 2004; Tobar and Wyseure, 2018; Rollenbeck et al., 2022).  
50 For the case of river deltas and estuaries, several studies have demonstrated that when an ocean forcing, such as a storm surge, co-occurs with high riverine discharge events, the resulting flood risks could be much higher than that driven by a single forcing event, leading to so-called compound flood risks (Fang et al., 2021; Wahl et al., 2015; Gori et al., 2022; Bevacqua et al., 2019; Couasnon et al., 2019). Previous studies on estuarine compound flood risks suggest that the contribution of extreme tides and peak discharges to the resulting estuarine ESLs is strongly dependent on the location within the estuary. How far  
55 each forcing contribution reaches varies largely among estuaries due to a great dependence on the geometry of the estuary (Harrison et al., 2022). Furthermore, in estuaries with small watersheds (order of hundreds km<sup>2</sup> and less), the hydrological response time between a rain event and the corresponding peak discharge tends to be short, and a storm-surge driven ESL can be strongly amplified if it co-occurs with the peak discharge (Zheng et al., 2013; Robins et al., 2018). In estuaries with larger watersheds (order of thousands km<sup>2</sup> and more) the response time tends to be much longer so that peak discharges may arrive  
60 in the tidal section of the estuary after the storm-surge driven ESLs has occurred and no compound flood risks take place (Bevacqua et al., 2019; Hendry et al., 2019). However, in case of a long-term intensification of precipitation (order of weeks to months, as in the case of strong El Niño events), risks for compound hazards also increase for larger estuaries (Dykstra and Dzwonkowski, 2021; Wu et al., 2021). So far there are no studies on estuarine or deltaic ESL dynamics due to long-term

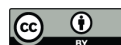

(weeks to months) combined increases in both river discharge and sea level, such as during strong El Niño events. Although  
65 Belliard et al. (2021) demonstrated a landward amplification of El Niño driven ESLs in an Eastern Pacific tropical river delta,  
it remains uncertain to what extent such landward amplification of ESLs is driven by compounding effects of both oceanic and  
riverine forcing.

The presence of coastal wetlands, such as mangroves in the tropics and tidal marshes in temperate regions, can contribute to  
reducing the peak water level of upstream propagating ESLs along estuarine or deltaic tidal channels (Temmerman et al.,  
70 2023). When the rising water levels exceed the elevation of channel banks, water can flow into the intertidal wetlands where  
it is temporarily stored, consequently contributing to lower upstream ESLs (Stark et al., 2015; Smolders et al., 2015; Dominicis  
et al., 2023; Horstman et al., 2015). Research on the capacity of mangroves to attenuate ESLs typically does not consider the  
interaction with increased river discharge while, vice versa, studies on compound flooding do not consider the role of intertidal  
wetlands (Wu et al., 2021; Harrison et al., 2022; Cao et al., 2020). Hence, to what extent estuarine or deltaic mangroves can  
75 mitigate the risks of compound flood hazards is poorly known. This question is of high relevance to many tropical to subtropical  
estuaries and deltas, where mangrove conversion to human land-use is a common practice, while mangrove conservation and  
restoration can be an effective nature-based strategy for flood risk mitigation (Gijssman et al., 2021; Temmerman et al., 2023).  
Here, we present a hydrodynamic modelling study of a large delta in Ecuador, aiming to elucidate the compound effects of El  
Niño driven oceanic and riverine forcing on ESL spatial dynamics. By analysing model scenarios, in which we isolate the  
80 oceanic or the riverine forcing, and combine both, we aim to identify their relative contributions and combined impacts on  
ESLs in the delta. Furthermore, all model scenarios are duplicated with and without inclusion of large mangroves present in  
the delta, to elucidate the capacity of mangroves to attenuate the landward amplification of El Niño-driven ESLs.

## 2. Methods

### 2.1 Study area

85 The Guayas delta is the largest river delta on the Pacific coast of South America, with a watershed of 32,300 km<sup>2</sup> (Frappart et  
al., 2017). In the upstream part of the delta plain, it accommodates the largest city and economic centre of Ecuador, Guayaquil  
(Fig. 1), home to about 3 million people, and ranking fourth globally among most vulnerable cities to coastal flooding  
(Hallegatte et al. 2013). More seaward from the city, the delta consists of a complex network of channels and mangroves,  
grown predominantly by *Rhizophora mangle*. As in many other tropical and subtropical river deltas and estuaries, large extents  
90 of mangroves have been replaced by aquaculture ponds such that only 63 % of the delta plain (about 1400 km<sup>2</sup>) is still covered  
by mangroves nowadays (Hamilton et al. 2019). The delta includes two major channel branches (Fig. 1). The eastern branch  
is fed by freshwaters from the Guayas river, which is formed at the confluence of the Babahoyo and Daule rivers. The discharge  
follows a strong seasonal variability ranging from 200 m<sup>3</sup>/s in the dry season (April - November) up to 1600 m<sup>3</sup>/s in the wet  
season (December - March) (INHAMI, 2019). The western branch, Estero El Salado, does not receive any significant  
95 freshwater discharge. At the seaside, the delta borders the Gulf of Guayaquil from where semidiurnal tides enter the delta with

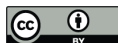

a mean tidal range of about 2 m. When propagating upstream through the delta, tides amplify resulting in mean tidal ranges of about 5 m near the city of Guayaquil.

As in other regions in the Eastern Pacific Ocean, El Niño is the main driver for ESLs in the Guayas delta (Belliard et al., 2021; Colas et al., 2008). For instance, during the particularly strong El Niño event of 1997-1998 that lasted over 18 months, the mean sea level increased up to 50 cm at the open coast, high water levels increased up to 90 cm above their normal values in the inner delta, and discharge values were 2.5 times higher than on average during the neutral phase of El Niño (Belliard et al. 2021).

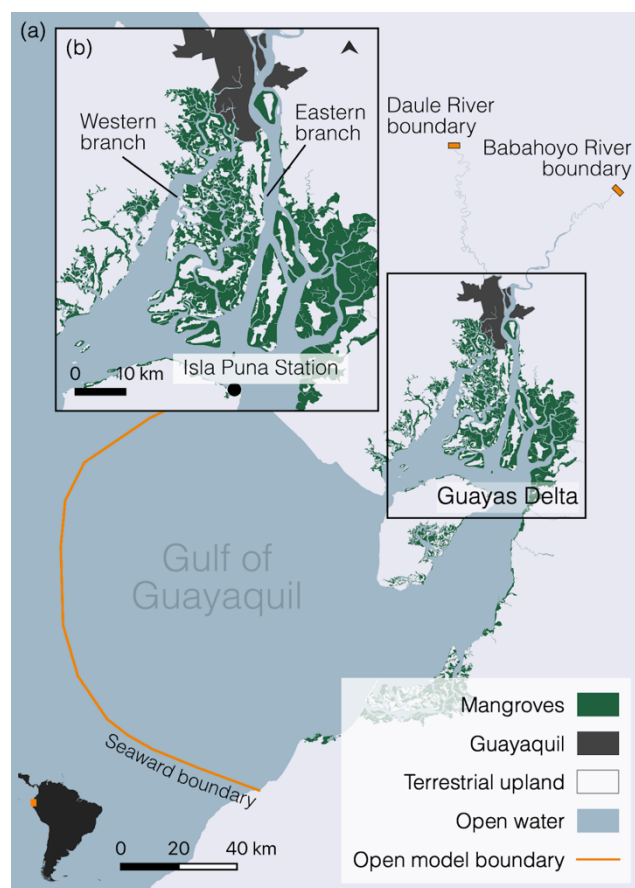

105 **Figure 1.** Map of the model domain (a), covering the Gulf of Guayaquil and the Guayas delta (b). The computational domain includes both the open water (in blue) and the mangrove areas (in green). The orange lines represent the open model boundaries: the seaward boundary downstream, and two freshwater boundaries upstream in the Daule and Babahoyo rivers.

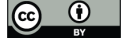

## 2.2 Model description

The present modelling study builds further on the work by Pelckmans et al. (2023), which presents the hydrodynamic model setup, calibration and validation against observed tidal water levels for 11 tide gauge stations throughout the delta. The present paper focuses on the modelling of extreme high water levels under El Niño conditions, whereas Pelckmans et al. (2023) only accounted for ENSO neutral conditions (i.e., without additional El Niño-driven forcing). Below we briefly summarise the model setup by Pelckmans et al. (2023), to which we refer the reader to for more details.

We model hydrodynamics of the Guayas delta using TELEMAC 2D v8p2r0 (Hervouet, 2007), which solves the depth-averaged shallow water equations:

$$\frac{\partial h}{\partial t} + \nabla \cdot h\mathbf{v} = 0 \quad (1)$$

$$\frac{\partial \mathbf{v}}{\partial t} + \mathbf{v} \cdot \nabla \mathbf{v} = -g\nabla\eta + \frac{1}{h} \nabla \cdot (h\nu\nabla\mathbf{v}) - \frac{\boldsymbol{\tau}_b + \boldsymbol{\tau}_v}{\rho h} \quad (2)$$

where  $h$  is the water depth (m),  $\nabla$  is the differential operator (/m),  $t$  is the time (s),  $\mathbf{v}$  is the depth-averaged flow velocity (m/s),  $g$  equals 9.81 m/s<sup>2</sup> is the gravitational acceleration,  $\eta$  is the water surface elevation above a reference level (m),  $\nu$  equals 0.01 m<sup>2</sup>/s and is the diffusion coefficient,  $\boldsymbol{\tau}_b$  is the bed shear stress (N/m<sup>2</sup>),  $\boldsymbol{\tau}_v$  is the vegetation-induced shear stress (i.e., drag force per unit surface area) (kg/ms<sup>2</sup>) and  $\rho$  equal to 1000 kg/m<sup>3</sup> is the water density.

The bed shear stress is computed using the Manning formulation:

$$\boldsymbol{\tau}_b = \frac{\rho g n^2}{h^3} \mathbf{v} \|\mathbf{v}\| \quad (3)$$

where  $n$  is the Manning coefficient, accounting for bed roughness accounting for the bed roughness, and here calibrated to a value of 0.0175 s/m<sup>1/3</sup> in the outer delta and the western branch, and to a value of 0.0125 s/m<sup>1/3</sup> in the eastern branch (Pelckmans et al., 2023). The vegetation-induced drag force is modelled as the drag force on random or staggered arrays of rigid vertical cylinders with uniform properties (Baptist et al., 2007; Horstman et al., 2021):

$$\boldsymbol{\tau}_v = \frac{1}{2} \rho C_D D M h \mathbf{v} \|\mathbf{v}\| \quad (4)$$

where  $C_D$  is the dimensionless bulk drag coefficient and equals 1 (Baptist et al., 2007),  $D$  is assumed to equal 3.5 cm and is the representative diameter of the mangrove prop roots and  $M$  is set equal to 85 m<sup>2</sup> as the representative density of prop roots. Values for the latter two are obtained from literature on observations of *Rhizophora* trees in Australia and Japan (Mazda et al., 2005, 1997).

The model domain includes the entire Gulf of Guayaquil (Fig. 1), stretching from the edge of the continental shelf in the open ocean up to the landward boundaries, which approximately correspond to the upstream tidal limits along the Daule and Babahoyo rivers. Intertidal areas, consisting of vegetated mangroves and bare mudflats, are delineated through remote sensing



and are included in the domain. The mesh becomes finer (1) along the bathymetric gradient from the open sea towards the delta mouth area, (2) with decreasing channel width in the channels dissecting the delta and (3) with decreasing distance to channels in the mangroves. Resulting mesh sizes range from 250 m at the open sea to 3 m in the narrowest channels. The bathymetry is obtained from the General Bathymetric Chart of the Ocean (GEBCO, 2020) in the open ocean and from the Oceanographic Institute of the Navy in Ecuador (INOCAR) inside the delta. The surface elevation of the mangrove forest is calibrated to match measured inundation levels (Belliard et al., 2021) and intertidal mudflat topographies were obtained through remote sensing. The model is validated against water levels at 11 tide gauge stations during a spring tide on October 29, 2019. Model performance is considered excellent with Nash and Sutcliffe model efficiency (Allen et al., 2007; Nash and Sutcliffe, 1970) of  $0.85 \pm 0.10$ , and root mean square error of  $0.18 \pm 0.09$  m.

## 2.3 Model boundaries

### 2.3.1 Seaward boundary

The El Niño seaward boundary condition, referred to as the El Niño oceanic forcing, was defined by selecting the spring tides on 1-3 March 1998, which depicted the highest water levels for the 1997-1998 El Niño event. Input values for tidal water levels at the seaward model boundary were obtained from global tidal models TPX09 (Egbert and Erofeeva, 2002). However, these do not explicitly include the local El Niño driven sea level anomalies in front of the Ecuadorian coast. Therefore, we increased all tidal water levels with a constant factor calibrated against observed water levels at the tide gauge station of Isla Puna in the delta mouth area (Fig. 1 and Fig. 2a). Belliard et al. (2021) had calculated the sea level anomalies (i.e., how much sea levels were higher due to the El Niño conditions as compared to neutral conditions, based on tidal harmonic analysis) on 1-3 March 1998 (Fig. 2b). We subtracted these sea level anomalies calculated by Belliard et al. (2021) from the earlier-mentioned El Niño-driven model boundary conditions, in order to simulate also a scenario of tides on 1-3 March 1998 as if they were not affected by the El Niño conditions (referred to here as the neutral scenario (Fig. 2a)). As such we defined the seaward tidal boundary conditions (i.e., oceanic forcing) for an El Niño and neutral scenario.

160

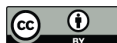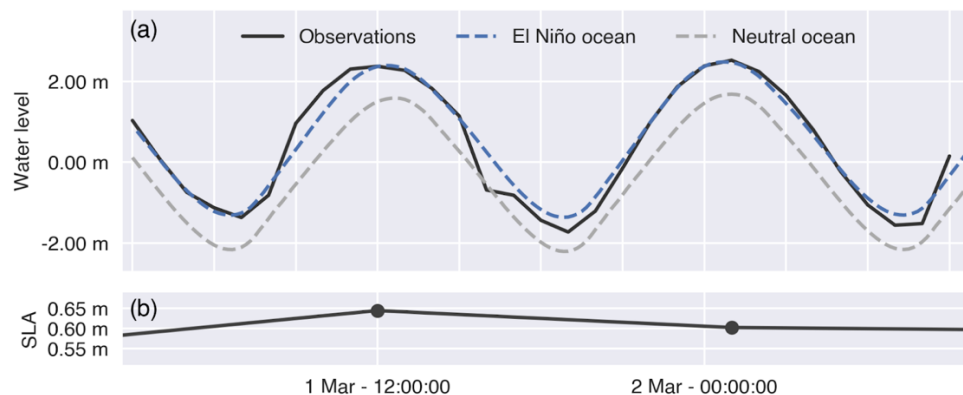

165 **Figure 2. Time series of (a) observed water levels at Isla Puna station on 1-3 March 1998 (Observations), simulated water levels under El Niño conditions (El Niño ocean) and neutral conditions (Neutral ocean). The latter are calculated by subtracting observed sea level anomalies (Belliard et al. 2021) (b) from the simulated water levels under El Niño conditions.**

### 2.3.2 Seaward boundary

The landward boundaries, near the upstream tidal limits along the Daule and Babahoyo rivers, were quantified based on observed river discharge data from INHAMI (Ecuador’s national meteorological and hydrological institute). These data only cover 73% of the watershed area which drains into the Guayas delta. Hence, we applied a precipitation-weighted linear  
 170 extrapolation based on monthly precipitation data collected from OpenLandMap (Hengl and Parente, 2022), as similarly presented by Pelckmans et al. (2023). The El Niño-driven landward boundary conditions, referred to as the El Niño riverine forcing, were defined using the daily extrapolated discharge series from 1-3 March 1998. River discharge anomalies (i.e., the difference in river discharges between El Niño and neutral conditions) were calculated as the difference between the 30-day moving average of extrapolated discharges over March 1998 and the 30-day moving average of extrapolated discharges  
 175 averaged over the neutral conditions observed in March 1993, 1995, 1999, 2001 (i.e., the nearest four neutral years around 1998; Fig. 3a and b). We estimated neutral conditions by subtracting these discharge anomalies from the El Niño discharge series (Fig. 3c and d). As such we defined the landward discharge boundary conditions (i.e., riverine forcing) for an El Niño and neutral scenarios.



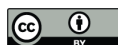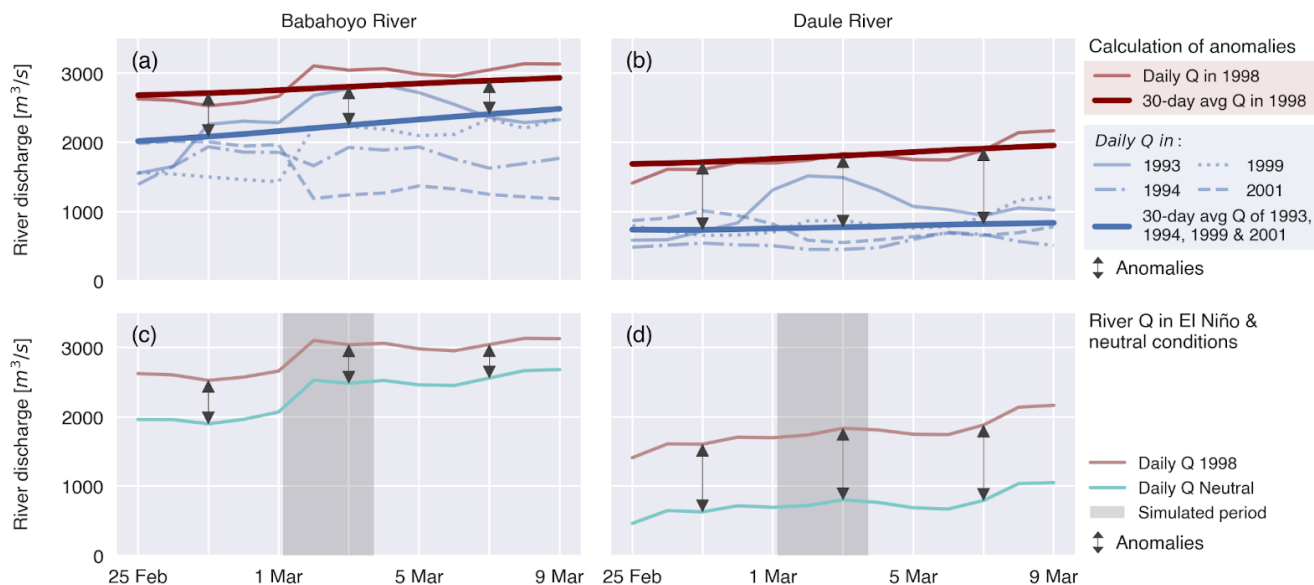

180 **Figure 3.** Calculation of river discharge (Q) anomalies from observed daily time series (a, b) and model input for daily river  
 discharges for the El Niño & neutral scenarios (c, d) for the Babahoyo (a, c) and Daule rivers (b, d). The thick red line is a 30-day  
 moving average of the daily river discharge time series observed during El Niño conditions in 1998 (thin red line). The thick blue  
 line shows a 30-day moving average of the daily river discharge time series observed during neutral conditions in 1993, 1994, 1999  
 185 and 2001 (closest 4 years to 1998 without El Niño or La Niña events). River discharge anomalies are calculated as the difference  
 between both 30-day moving means (a, b). Daily neutral river discharge values, as imposed at the upstream model boundaries, are  
 calculated by subtracting the anomalies from the daily river discharges of 1998 (c, d).

### 2.3 Model scenarios

We set up 12 different model scenarios, with the aim to distinguish (1) the effect of El Niño vs. neutral conditions prescribed  
 as seaward and landward boundary conditions (i.e., ocean and riverine forcing), (2) the effect of including vs. excluding the  
 190 mangroves in the model domain (Table 1) on ESLs spatial distribution along the delta and (3) exploring the sensitivity of the  
 strength of an El Niño event to the effect of mangroves. The first effect is studied by a scenario where we impose both increased  
 sea levels and increased river discharge (referred to as “El Niño ocean & river” scenario in Table 1), a scenario where we only  
 include increased sea level (“El Niño ocean”), a scenario where we only include increased river discharge (“El Niño river”),  
 and a scenario where we impose neutral conditions to both land- and seaward boundaries (“Neutral”). These four scenarios are  
 195 run with inclusion of the mangrove areas in the domain i.e., allowing them to flood, and their exclusion i.e., preventing them  
 from flooding by setting the mangrove platform elevation 10 m higher than the high water levels (HWLs). Furthermore, we  
 include 4 models similar to the “El Niño ocean & river” where we have increased and decreased the sea level and discharge  
 anomaly with 50 % and for each scenario included and excluded the mangroves (“El Niño ocean & river + 50 % and El Niño  
 ocean & river – 50 %”). To compare all scenarios, we show high water levels along the eastern branch of the delta, HWLs for  
 200 the western branch are added in supplementary materials (Figure A1 and A2). In addition, high water level anomalies  
 (HWLAs) are calculated as the difference between high water levels from a scenario including an El Niño forcing and the



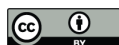

corresponding neutral scenario. HWLAs for the scenarios with mangroves are calculated using the Neutral scenarios with mangroves and HWLAs for scenarios without mangroves are calculated using the Neutral scenario without mangroves.

205 **Table 1. Overview of the scenarios.**

|                                                          |                                                  |
|----------------------------------------------------------|--------------------------------------------------|
| El Niño ocean & river – with mangroves                   | El Niño ocean & river – without mangroves        |
| El Niño ocean– with mangroves                            | El Niño ocean– without mangroves                 |
| El Niño river – with mangroves                           | El Niño river – without mangroves                |
| Neutral – with mangroves                                 | Neutral – without mangroves                      |
| <b>El Niño ocean &amp; river + 50 % - with mangroves</b> | El Niño ocean & river + 50 % - without mangroves |
| <b>El Niño ocean &amp; river – 50 % - with mangroves</b> | El Niño ocean & river – 50 % - without mangroves |

### 3. Results

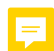

#### 3.1 Effect of El Niño forcings

210 The highest HWLs occur when including both the El Niño riverine and oceanic forcing (Fig. 4). In- or excluding the oceanic forcing has a much larger effect than in- or excluding the riverine forcing. When imposing the oceanic forcing, HWLs increase over the entire delta compared to the neutral scenario. In contrast, when imposing the riverine forcing, HWLs are only higher compared to the neutral scenario, upstream from the 100 km mark (Fig. 4).

215 When mangroves are included in the model, HWLAs are amplified upstream only if we impose the El Niño riverine forcing (Fig. 5). In all scenarios with mangroves, HWLAs remain constant in the first 60 km from the open sea, before slightly decreasing in the central part of the delta (60 - 120 km), except for the scenario of only El Niño riverine forcing. In the most upstream part of the delta (100 km - 148 km), HWLAs continue to decrease without El Niño riverine forcing but increase again with El Niño riverine forcing.

#### 3.2 Effect of mangroves vs. no mangroves

220 Excluding mangroves results in higher HWLs, regardless of the boundary conditions (Fig. 4). The highest upstream HWLs were simulated when including both El Niño ocean and riverine forcing and when mangroves were excluded. In addition, the higher the HWLs are with mangroves, the higher the HWLs increase when removing the mangroves. In comparison with their respective scenarios with mangroves, HWLs are up to 40 cm higher with both El Niño ocean and riverine forcing, and up to 38 cm higher with El Niño oceanic forcing only. However, with neutral and El Niño riverine forcing, HWLs are only up to 21  
225 cm and 22 cm higher, respectively, when mangroves are excluded.



Our simulations show that mangroves prevent the upstream amplification of HWLAs, while excluding mangroves causes HWLAs to increase upstream (Fig. 5). Furthermore, the effect of in- or excluding the mangroves ranges much further downstream than in- or excluding the riverine forcing. Similar to HWLs, the largest upstream HWLAs, and thus also the strongest increase in HWLAs, were simulated for the El Niño ocean & river scenario and when mangroves were excluded.

230

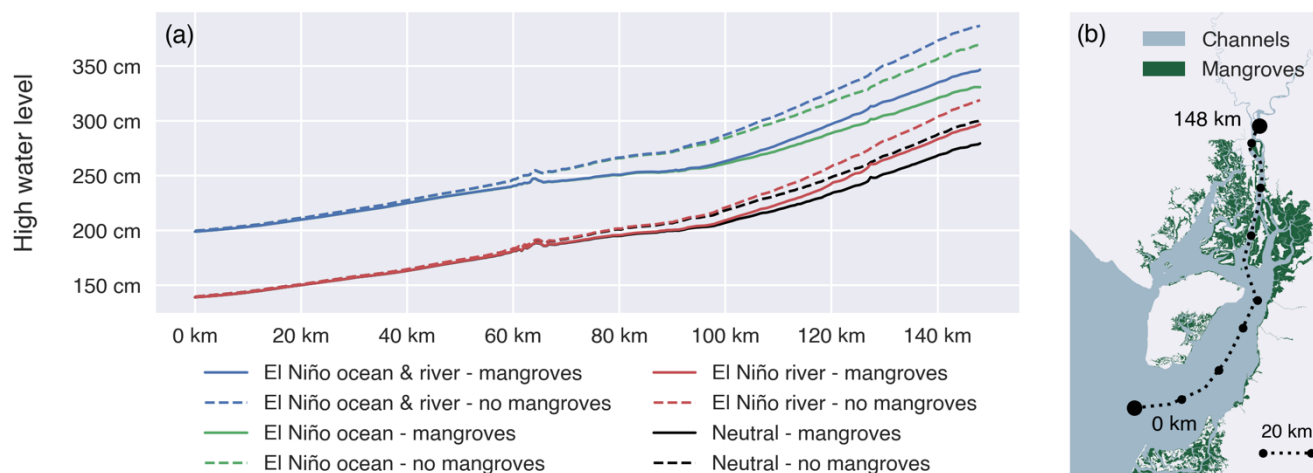

235

**Figure 4. Maximum High water levels (a) during the simulated spring tides over a transect (b) running from the seaward boundary of the Gulf of Guayaquil through the eastern main branch of the Guayas river, receiving direct river discharge, for four scenarios, each one simulated with and without mangroves: a scenario with El Niño ocean and riverine forcing, with only El Niño oceanic forcing, with only El Niño riverine forcing and with neutral conditions (without El Niño forcing) at both sea- and landward boundaries.**

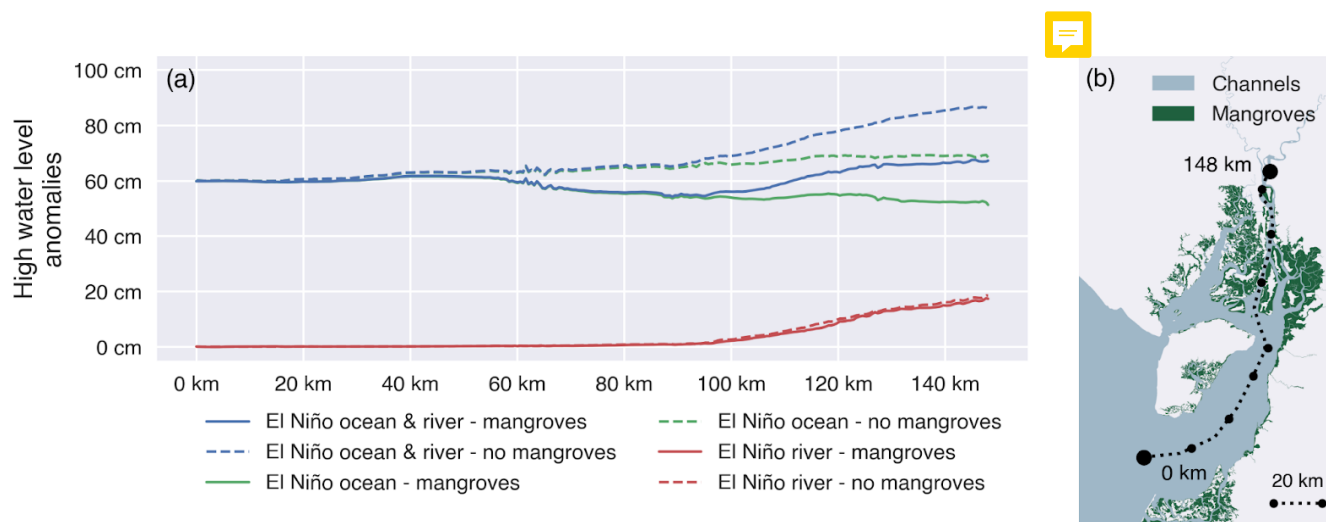

240

**Figure 5. High water level anomalies (a) during the simulated spring tide over a transect (b) running from the seaward boundary of the Gulf of Guayaquil through the eastern main branch of the Guayas river, receiving direct river discharge, for three scenarios, each one simulated with and without mangroves: a scenario with El Niño ocean and riverine forcing, with only El Niño oceanic**

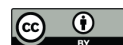

forcing and with only El Niño riverine forcing. High water level anomalies are defined as the difference between each model scenario and the corresponding Neutral model scenario (without El Niño forcing).

### 3.2 Effect of strength of El Niño forcings

245 With stronger El Niño forcing, HWLAs increase over the entire delta (Figure 6). The effect of excluding mangroves increases with forcing strength, where the scenario with a 50 % increase in El Niño forcings results in the largest difference between HWLAs with and without mangroves. Similarly, the smallest effect of mangroves results from the scenario where the forcings are lowered with 50 %. For all scenarios, the upstream increase in HWLAs are significantly lower for the scenarios with mangroves vs. scenarios without mangroves. The upstream increase of HWLAs for all scenarios with mangroves is similar for all scenarios, regardless of the strength of the El Niño forcings.

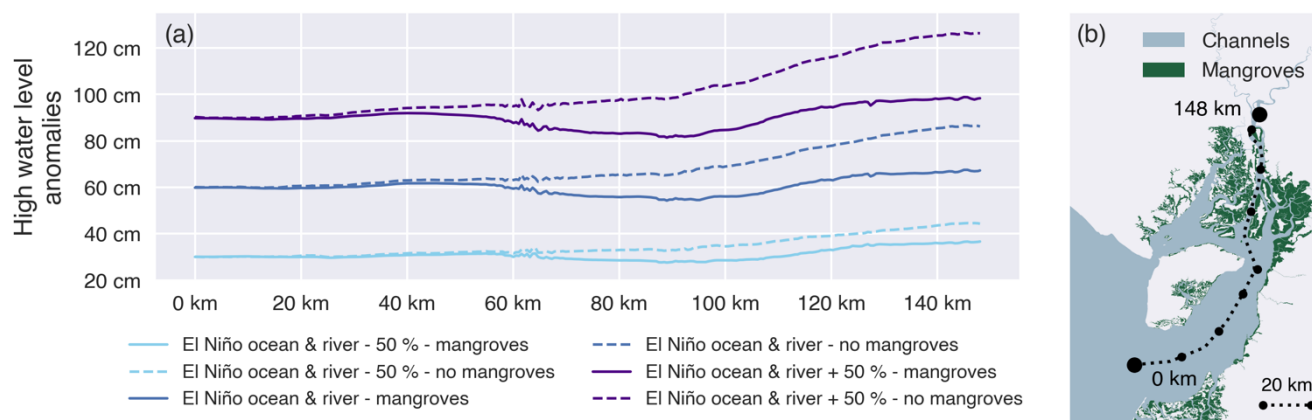

255 **Figure 6. High water level anomalies (a) during the simulated spring tide over a transect (b) running from the seaward boundary of the Gulf of Guayaquil through the eastern main branch of the Guayas river, receiving direct river discharge, for three scenarios, each one simulated with and without mangroves: a scenario with 50 % of the El Niño ocean and riverine forcing (“El Niño ocean & river – 50 %”), 100 % of the El Niño ocean and riverine forcing (“El Niño ocean & river”) and with 150 % of the El Niño ocean and riverine forcing (“El Niño ocean & river + 50 %”). High water level anomalies are defined as the difference between each model scenario and the corresponding Neutral model scenario (without El Niño forcing).**

## 260 4. Discussion

Current knowledge of estuarine compound flood hazards, coming from a combination of oceanic and riverine sources, is limited to short-term events such as storm surges and does not assess the capacity of intertidal wetlands, such as mangroves, to attenuate compound flood hazards (Wu et al., 2021; Harrison et al., 2022; Dykstra and Dzwonkowski, 2021; Sampurno et al., 2022). Here we demonstrate that for an event during which both the river discharge and the mean sea level are increased for longer periods, such as during a strong El Niño event (continuing weeks to months) in an Eastern Pacific river delta, HWLs are higher than if only one of such forcing would occur. More specifically, while the oceanic forcing is the main contributor to HWLs over the entire delta (Fig. 4), the riverine forcing causes an upstream amplification of the HWLAs (Fig. 5). Furthermore, our results show that large extents of mangroves present in the delta attenuate part of the oceanic contribution to



the HWLAs, with the attenuating effect increasing in the landward direction and increasing with the strength of the forcings  
270 (Fig. 5). However, the mangroves are not able to attenuate the riverine contribution to HWLAs. 

#### 4.1 Contributions of riverine and oceanic forcing

By comparing scenarios, which combine and isolate the oceanic and riverine forcing, we identify the oceanic forcing as the  
most important driver of ESLs over the entire Guayas delta (Fig. 4 and Fig. 5). Nevertheless, we also show that the upstream  
amplification of ESLs, also identified by Belliard et al. (2021) from analyses of tide gauge records, is caused by the riverine  
275 forcing. Similarly, for storm surges, modelling studies have confirmed that increased river discharges have little effect in the  
downstream and central sections of a delta (Kumbier et al., 2018). There is typically, however, a tipping point from which an  
increased discharge adds to ESLs caused by the oceanic forcing in the upstream part (Gori et al., 2020). Such a tipping point  
is clearly visible in our simulation results at approximately 100 km along the studied transect (Fig. 4). For storm surges, the  
location of a tipping point depends on the relative strength of the oceanic vs. riverine forcing, with a seaward shift in case of  
280 more extreme discharge (Jane et al., 2022; Gori et al., 2020; Harrison et al., 2022). Therefore, the location of the tipping point  
in the Guayas Delta is most likely to be specific to each El Niño event. As the magnitude of the oceanic and riverine forcing  
can vary largely between El Niño events (Belliard et al., 2021), the location of the tipping point will most likely vary  
accordingly. 

Hence, in the most upstream part of deltas and estuaries, the co-occurrence of increased river discharges with increased sea  
285 levels can locally result in ESLs (Kumbier et al., 2018; Dykstra and Dzwonkowski, 2021). Despite only occurring in a limited  
area within a delta, such compound events can cause severe flooding of surrounding built-up areas (Olbert et al., 2017).

#### 4.2 El Niño-driven compound flooding

We show for a large river delta (watershed of 32.200 km<sup>2</sup>) that the co-occurrence of El Niño-driven increased discharge and  
increased sea levels both add up to amplify ESLs (Fig. 4). For storm surges, however, previous studies have pointed out that  
290 compound flooding typically only occurs in small estuaries with a watershed smaller than 5000 km<sup>2</sup> (Bevacqua et al., 2019;  
Wahl et al., 2015). For estuaries with larger watersheds, the longer lag time between intense storm precipitations and estuarine  
peak discharges implies that the latter riverine forcing typically occurs later than the oceanic storm surge forcing (Dykstra and  
Dzwonkowski, 2020). The magnitude and frequency of compound floodings are therefore strongly dependent on the relative  
timing of peak river discharge, storm surge and astronomical high tide (Olbert et al., 2013; Wahl et al., 2015). When the  
295 intensification of precipitation is driven by long-term climatic fluctuations, such as El Niño (continuing for several weeks to a  
few months), the likelihood of ocean-driven ESLs to be amplified by peak river discharges increases (Dykstra and  
Dzwonkowski, 2021; Wu et al., 2021). In the Guayas delta, El Niño causes sea levels and river discharges to increase for  
multiple months (Belliard et al. 2021). Consequently, the HWLAs in the delta resulting from the oceanic and riverine forcing  
occur simultaneously and both contribute to ESLs in the delta.



### 300 **4.3 Upstream increase of high water level anomalies and attenuation by mangroves**

We found that the upstream increase of HWLAs is attributed to the riverine forcing (Fig. 5). This confirms the upstream amplification of HWLAs found from the analysis of tide gauge observations in the Guayas delta, and the suggestion that this upstream amplification coincides with a shift from predominantly oceanic to riverine El Niño forcing on the the HWLAs (Belliard et al. 2021). Our results suggest that without a riverine forcing, there is an upstream decrease in HWLAs (Fig. 5).

305 The latter can be largely explained by the presence of intertidal wetlands such as mangroves, as our simulations without mangroves result in landward increasing HWLAs along the estuary, even without riverine forcing (Fig. 5). We show that large extents of mangroves in a delta can effectively attenuate a part of the oceanic contribution to the HWLAs, and that this attenuating effect is increasing landwards.

310 When oceanic driven HWLs enter the delta and exceed the channel banks, water flows laterally into the fringing mangroves where it is spread out and temporarily stored, as such attenuating the upstream propagation of HWLs (Horstman et al., 2013; Smolders et al., 2015). Hence, when HWLs travel longer through channels fringed by mangroves, more water can be temporarily stored within the mangroves, which explains why this attenuation effect increases upstream. In addition, as estuarine channels become narrower upstream, the total tidal prism decreases and as such, the relative part of the tidal prism  
315 which is temporarily stored in the mangroves increases upstream. Consequently, upstream intertidal wetlands have a stronger attenuation effect than downstream intertidal wetlands of the same surface area (Smolders et al. 2015). Furthermore, with increasing El Niño forcings, the effect of the in- or excluding mangroves increase. With higher water levels, a larger portion of the tidal prism is stored in the surrounding mangroves, causing lower upstream HWLs.

320 HWLs are lower in our simulations with mangroves than without mangroves, also for the scenarios with only riverine forcing (Fig. 5). The mangroves also attenuate normal spring tides propagating from the sea during neutral conditions. However, the anomalies due to the riverine forcing are not affected by the presence of mangroves (Fig. 5). Indeed, the riverine discharge does not flow through mangrove-fringing channels upon arriving in the delta (Fig. 1), and therefore the increase in HWLs due to increased discharge is not affected by the mangroves. 

### 325 **4.4 Mangrove loss due to ENSO**

While we show that mangroves can mitigate El Niño-related extreme sea levels, ENSO related climate extremes can cause extensive mangrove dieback event (Sippo et al., 2018). To our knowledge no studies have explored the role of ENSO in eastern-Pacific mangrove dieback events. Nevertheless, Belliard et al. (2021) has shown that the opposite ENSO phase of El Niño, La Niña, can be associated with temporary drops in sea level and as such, can create dry and increased saline conditions  
330 similar as during extensive mangrove dieback events in Australia (Duke et al., 2017; Lovelock et al., 2017). In addition, increased sea levels might result in excessive flooding of mangroves which might have similar effects as submergence under

long-term SLR and lead to loss of mangroves (Lovelock et al., 2015). With predicted increase in ENSO variability (Cai et al., 2022), mangrove diebacks conditions are likely increase as well. Further research is needed to assess the vulnerability of current mangroves to extreme ENSO event, especially in the Eastern Pacific.

335

#### 4.4 Implications

The co-occurrence of a riverine and oceanic forcing, as typically taking place during an El Niño event at the Pacific coast of equatorial Latin America, results in a landward amplification of HWLAs and associated flood risks. Storm-driven compound floods in the tropics are expected to decrease in frequency (Bevacqua et al., 2020), but we show that climatic fluctuations such as ENSO, could also lead to ESLs in river deltas and thus, should be taken into consideration when assessing future compound flood risks for densely populated cities.

Due to El Niño-driven ESL events, it is expected that an additional 30 % of the population of Ecuador, Peru, Panama, El Salvador, Guatemala and Costa Rica will be exposed to coastal flooding, in comparison with coastal flooding due to long-term sea level rise only, by the end of the century (Reguero et al., 2015). However, due to the landward increasing HWLAs and associated flood risks, also upstream areas in river deltas can be exposed to ESLs and even a larger fraction of the population might be vulnerable to coastal flooding. Furthermore, recent studies point out a possible intensification of El Niño and the related oceanic and riverine forcing (Lee et al., 2021; Cai et al., 2022; Widlansky et al., 2015), and as such an intensification of upstream compound flood risks may be expected.

Mangroves have a landward increasing attenuation effect on HWLAs and their role increases with the strength of the El Niño related anomalies. As the compound effect of ESLs and increased discharge result in increasing flood risks particularly for inland cities in deltas or estuaries, there is also a larger potential for intertidal wetland conservation and restoration as a nature-based defence flood defence strategy (Temmerman et al., 2023). However, for many deltas and estuaries, there is a large economic pressure for conversion of mangroves into human land use such as aquaculture, agriculture and urban lands (Thomas et al., 2017; Goldberg et al., 2020; Richards et al., 2020). In all countries along the Pacific coast of Central and South America which have been associated with increased coastal sea levels during past El Niño events (Hamlington et al., 2016) mangrove extent has decreased between 1996 and 2020 according to the global mangrove watch (Bunting et al., 2018). Also for the Guayas delta, a third of the original mangrove forests have been replaced in favour of shrimp-producing aquaculture since the 1960s (Hamilton, 2019). Our study already indicates a significant attenuation effect of the current mangrove extent, and therefore this attenuation effect has very likely decreased together with the mangrove extent in the past six decades. Especially in tropical and subtropical countries where large mangrove forests still remain, the conservation of mangroves can be an effective nature-based strategy to mitigate flood risks driven by ESL events, in addition to local engineered flood defences in inhabited areas along deltas and estuaries. While the potential for mangrove conservation as flood buffers has been addressed for coastal areas prone to storm surges (Temmerman et al. 2023), we want to extend this to other coastal regions, such as the



365 Pacific coast of Central and South America. For deltas where mangrove forests have been converted in the past, mangrove  
restoration can potentially restore the flood attenuation capacity, in addition to other ecosystem services such as carbon  
sequestration, fishery production, water quality regulation and wood production (Su et al., 2021). There is, however, still a  
limited understanding on how the mangrove-induced reduction of ESLs depends on the location and spatial configuration of  
mangrove conservation and restoration areas within a delta or estuary. Our results call for further advanced investigations  
370 of what is the most optimal spatial configuration of mangrove conservation and restoration programs, depending on factors  
such as the spatial geometry of deltas or estuaries, and the relative contribution of oceanic and riverine forcing to extreme high  
water levels (Pelckmans et al., *in prep*). 

## Appendices

### 375 Appendix A

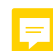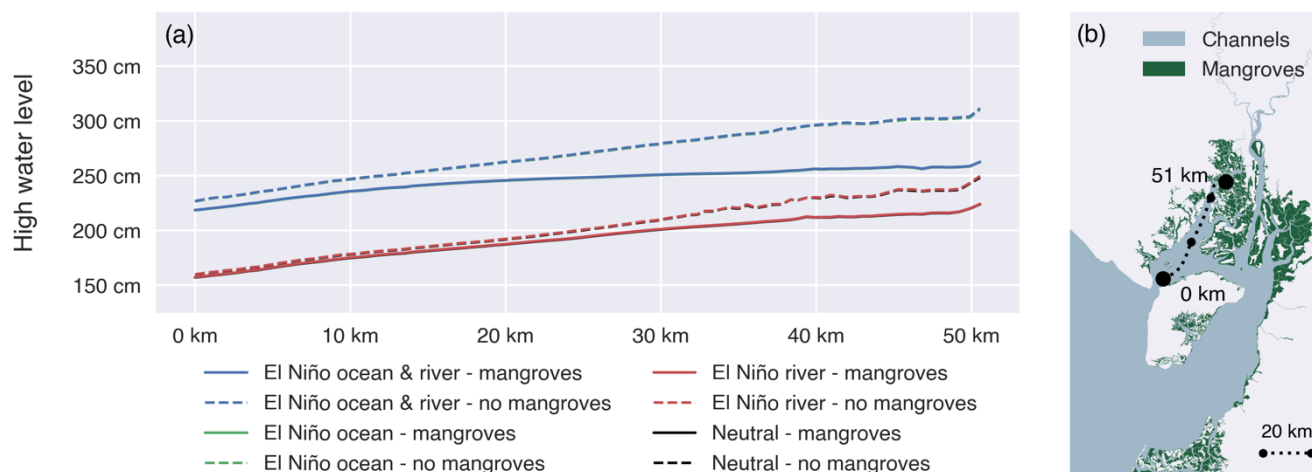

380 **Figure A1. High water levels (a) during the simulated spring tide over a transect running from the northern entrance of the delta through the western main branch of the Guayas delta, receiving no river discharge (b), for four scenarios, each one simulated with and without mangroves: a scenario with increased ocean water levels and increased river discharge, with only increased ocean water levels, with only increased discharge and with neutral conditions at both sea- and landward boundaries. Note that differences between both El Niño ocean & river scenarios and El Niño ocean scenarios are negligible, and differences between both El Niño river scenarios and Neutral scenarios are negligible.**



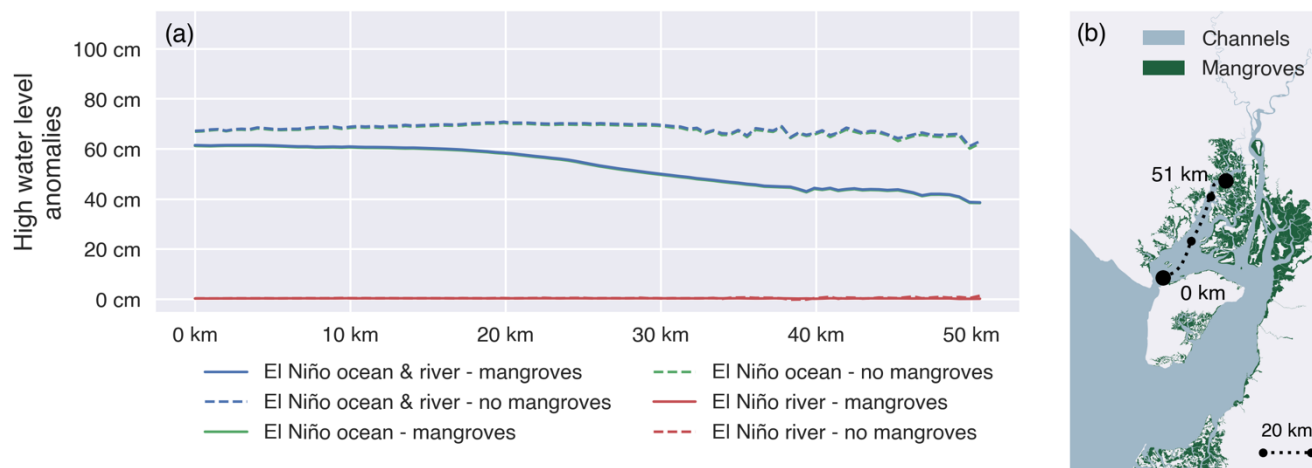

385

**Figure A2. High water levels (A) during the simulated spring tide over a transect running from the northern entrance of the delta through the western main branch of the Guayas delta, receiving no river discharge (B), for three scenarios, each one simulated with and without mangroves: a scenario with increased ocean water levels and increased river discharge, with only increased ocean water levels, with only increased discharge and with neutral conditions at both sea- and landward boundaries. High water level anomalies are defined as the difference between each model scenario and the Neutral model scenario.**

390

### Author contributions

395 IP, JPB, LD, ST and OG contributed to the design of the study and collecting the necessary data. IP and OG performed the model setup and scenario design with contributions and feedback from JPB and ST. IP wrote the first draft of the manuscript. All authors contributed to writing and revising the manuscript and approved the submitted version.

### Competing interests of Interest

The authors declare that they have no conflict of interest.

### 400 Acknowledgments

We thank Jan De Nul and INOCAR for sharing their tide gauge data and INHAMI for sharing river discharge data. The computational resources and services used in this work were provided by the HPC core facility CalcUA of the Universiteit Antwerpen, and VSC (Flemish Supercomputer Center), funded by the Research Foundation - Flanders (FWO) and the Flemish



Government. Furthermore, we would like to thank the Research Foundation Flanders (FWO, Belgium) for the PhD fellowship  
405 for fundamental research for I. Pelckmans (11E0723N). J.-P. Belliard is supported by FED-tWIN ABioGrad. O. Gourge was  
supported by the European Union's Horizon 2020 research and innovation program under the Marie Skłodowska-Curie grant  
agreement No 798222. The study was locally supported in the context of the VLIR-UOS Ecuador Biodiversity Network  
project.

### Data Availability

410 All model results (water levels) are available upon request with the authors.

### References

- Allen, J. I., Somerfield, P. J., and Gilbert, F. J.: Quantifying uncertainty in high-resolution coupled hydrodynamic-ecosystem  
models, *J Marine Syst*, 64, 3–14, <https://doi.org/10.1016/j.jmarsys.2006.02.010>, 2007.
- 415 Baptist, M. J., Babovic, V., Uthurburu, J. R., Keijzer, M., Uittenbogaard, R. E., Mynett, A., and Verwey, A.: On inducing  
equations for vegetation resistance, *Journal of Hydraulic Research*, 45, 435–450,  
<https://doi.org/10.1080/00221686.2007.9521778>, 2007.
- Barnard, P. L., Short, A. D., Harley, M. D., Splinter, K. D., Vitousek, S., Turner, I. L., Allan, J., Banno, M., Bryan, K. R.,  
420 Doria, A., Hansen, J. E., Kato, S., Kuriyama, Y., Randall-Goodwin, E., Ruggiero, P., Walker, I. J., and Heathfield, D. K.:  
Coastal vulnerability across the Pacific dominated by El Niño/Southern Oscillation, *Nat Geosci*, 8, 801–807,  
<https://doi.org/10.1038/ngeo2539>, 2015.
- Belliard, J.-P., Dominguez-Granda, L. E., Ramos-Veliz, J. A., Rosado-Moncayo, A. M., Nath, J., Govers, G., Gourgue, O.,  
425 and Temmerman, S.: El Niño driven extreme sea levels in an Eastern Pacific tropical river delta: Landward amplification and  
shift from oceanic to fluvial forcing, *Global Planet Change*, 203, 103529, <https://doi.org/10.1016/j.gloplacha.2021.103529>,  
2021.
- Bevacqua, E., Maraun, D., Vousdoukas, M. I., Voukouvalas, E., Vrac, M., Mentaschi, L., and Widmann, M.: Higher  
430 probability of compound flooding from precipitation and storm surge in Europe under anthropogenic climate change, *Sci Adv*,  
5, eaaw5531, <https://doi.org/10.1126/sciadv.aaw5531>, 2019.
- Bevacqua, E., Vousdoukas, M. I., Zappa, G., Hodges, K., Shepherd, T. G., Maraun, D., Mentaschi, L., and Feyen, L.: More



meteorological events that drive compound coastal flooding are projected under climate change, *Commun Earth Environ*, 1,  
435 47, <https://doi.org/10.1038/s43247-020-00044-z>, 2020.

Bunting, P., Rosenqvist, A., Lucas, R. M., Rebelo, L.-M., Hilarides, L., Thomas, N., Hardy, A., Itoh, T., Shimada, M., and  
Finlayson, C. M.: The Global Mangrove Watch—A New 2010 Global Baseline of Mangrove Extent, *Remote Sens.*, 10, 1669,  
440 <https://doi.org/10.3390/rs10101669>, 2018.

Cai, W., Ng, B., Wang, G., Santoso, A., Wu, L., and Yang, K.: Increased ENSO sea surface temperature variability under four  
IPCC emission scenarios, *Nat Clim Change*, 12, 228–231, <https://doi.org/10.1038/s41558-022-01282-z>, 2022.

Cao, Y., Zhang, W., Zhu, Y., Ji, X., Xu, Y., Wu, Y., and Hoitink, A. J. F.: Impact of trends in river discharge and ocean tides  
445 on water level dynamics in the Pearl River Delta, *Coast Eng.*, 157, 103634, <https://doi.org/10.1016/j.coastaleng.2020.103634>,  
2020.

Chang, Y.-T., Du, L., Zhang, S.-W., and Huang, P.-F.: Sea level variations in the tropical Pacific Ocean during two types of  
recent El Niño events, *Global Planet Change*, 108, 119–127, <https://doi.org/10.1016/j.gloplacha.2013.06.001>, 2013.  
450 Colas, F., Capet, X., McWilliams, J. C., and Shchepetkin, A.: 1997–1998 El Niño off Peru: A numerical study, *Prog Oceanogr*,  
79, 138–155, <https://doi.org/10.1016/j.pocean.2008.10.015>, 2008.

Couasnon, A., Eilander, D., Muis, S., Veldkamp, T. I. E., Haigh, I. D., Wahl, T., Winsemius, H. C., and Ward, P. J.: Measuring  
compound flood potential from river discharge and storm surge extremes at the global scale, *Nat Hazard Earth Sys*, 20, 489–  
455 504, <https://doi.org/10.5194/nhess-20-489-2020>, 2019.

Dominicis, M. D., Wolf, J., Hespen, R. van, Zheng, P., and Hu, Z.: Mangrove forests can be an effective coastal defence in the  
Pearl River Delta, China, *Commun Earth Environ*, 4, 13, <https://doi.org/10.1038/s43247-022-00672-7>, 2023.

Duke, N. C., Kovacs, J. M., Griffiths, A. D., Preece, L., Hill, D. J. E., Oosterzee, P. van, Mackenzie, J., Morning, H. S., and  
Burrows, D.: Large-scale dieback of mangroves in Australia’s Gulf of Carpentaria: a severe ecosystem response, coincidental  
with an unusually extreme weather event, *Mar. Freshw. Res.*, 68, 1816, <https://doi.org/10.1071/mf16322>, 2017.

Dykstra, S. L. and Dzwonkowski, B.: The Propagation of Fluvial Flood Waves Through a Backwater–Estuarine Environment,  
465 *Water Resour Res*, 56, <https://doi.org/10.1029/2019wr025743>, 2020.

Dykstra, S. L. and Dzwonkowski, B.: The Role of Intensifying Precipitation on Coastal River Flooding and Compound River-

Storm Surge Events, Northeast Gulf of Mexico, *Water Resour Res*, 57, e2020WR029363, <https://doi.org/10.1029/2020wr029363>, 2021.

470

Egbert, G. D., & Erofeeva, S. Y.: Efficient Inverse Modeling of Barotropic Ocean Tides, *Journal of Atmospheric and Oceanic Technology*, 19, 2, 183–204. [https://doi.org/10.1175/1520-0426\(2002\)](https://doi.org/10.1175/1520-0426(2002)), 2002.

Fang, J., Wahl, T., Fang, J., Sun, X., Kong, F., and Liu, M.: Compound flood potential from storm surge and heavy precipitation in coastal China: dependence, drivers, and impacts, *Hydrol Earth Syst Sc*, 25, 4403–4416, <https://doi.org/10.5194/hess-25-4403-2021>, 2021.

475

Fox-Kemper, B., Hewitt, H. T., Xiao, C., Aðalgeirsdóttir, G., Drijfhout, S. S., Edwards, T. L., Golledge, N. R., Hemer, M., Kopp, R. E., Krinner, G., Mix, A., Notz, D., Nowicki, S., Nurhati, I. S., Ruiz, L., Sallée, J.-B., Slangen, A. B. A., and Yu, Y.: Ocean, Cryosphere and Sea Level Change, 1211–1362, <https://doi.org/10.1017/9781009157896.011>, 2021.

480

Frappart, F., Bourrel, L., Brodu, N., Salazar, X. R., Baup, F., Darrozes, J., and Pombosa, R.: Monitoring of the Spatio-Temporal Dynamics of the Floods in the Guayas Watershed (Ecuadorian Pacific Coast) Using Global Monitoring ENVISAT ASAR Images and Rainfall Data, *Water-sui*, 9, 12, <https://doi.org/10.3390/w9010012>, 2017.

485

Gijssman, R., Horstman, E. M., Wal, D. van der, Friess, D. A., Swales, A., and Wijnberg, K. M.: Nature-Based Engineering: A Review on Reducing Coastal Flood Risk With Mangroves, *Frontiers in Marine Science*, 8, <https://doi.org/10.3389/fmars.2021.702412>, 2021.

Goldberg, L., Lagomasino, D., Thomas, N., and Fatoyinbo, T.: Global declines in human-driven mangrove loss, *Global Change Biol*, 26, 5844–5855, <https://doi.org/10.1111/gcb.15275>, 2020.

490

Gori, A., Lin, N., and Smith, J.: Assessing Compound Flooding From Landfalling Tropical Cyclones on the North Carolina Coast, *Water Resour Res*, 56, <https://doi.org/10.1029/2019wr026788>, 2020.

495

Gori, A., Lin, N., Xi, D., and Emanuel, K.: Tropical cyclone climatology change greatly exacerbates US extreme rainfall–surge hazard, *Nat Clim Change*, 12, 171–178, <https://doi.org/10.1038/s41558-021-01272-7>, 2022.

Hamilton, S. E.: *Mangroves and Aquaculture: A Five Decade Remote Sensing Analysis of Ecuador’s Estuarine Environments*, Springer, <https://doi.org/10.1007/978-3-030-22240-6>, 2019.

500



- Hamlington, B. D., Cheon, S. H., Thompson, P. R., Merrifield, M. A., Nerem, R. S., Leben, R. R., and Kim, K. -Y.: An ongoing shift in Pacific Ocean sea level, *J. Geophys. Res.: Oceans*, 121, 5084–5097, <https://doi.org/10.1002/2016jc011815>, 2016.
- 505 Harrison, L. M., Coulthard, T. J., Robins, P. E., and Lewis, M. J.: Sensitivity of Estuaries to Compound Flooding, *Estuaries Coasts*, 45, 1250–1269, <https://doi.org/10.1007/s12237-021-00996-1>, 2022.
- Hendry, A., Haigh, I. D., Nicholls, R. J., Winter, H., Neal, R., Wahl, T., Joly-Laugel, A., and Darby, S. E.: Assessing the characteristics and drivers of compound flooding events around the UK coast, *Hydrol Earth Syst Sc*, 23, 3117–3139, 510 <https://doi.org/10.5194/hess-23-3117-2019>, 2019.
- Hengl, T. and Parente, L.: Monthly precipitation in mm at 1 km resolution (multisource average) based on SM2RAIN-ASCAT 2007-2021, CHELSA Climate and WorldClim, <https://doi.org/10.5281/zenodo.6458580>, 2022.
- 515 Hervouet, J.: *Hydrodynamics of Free Surface Flows*, Hoboken, NJ, United States: Wiley-Blackwell, Hoboken, NJ, United States: Wiley-Blackwell, <https://doi.org/10.1002/9780470319628>, 2007.
- Hinkel, J., Lincke, D., Vafeidis, A. T., Perrette, M., Nicholls, R. J., Tol, R. S. J., Marzeion, B., Fettweis, X., Ionescu, C., and Levermann, A.: Coastal flood damage and adaptation costs under 21st century sea-level rise, *Proc National Acad Sci*, 111, 520 3292–3297, <https://doi.org/10.1073/pnas.1222469111>, 2014.
- Horstman, E. M., Dohmen-Janssen, C. M., and Hulscher, S. J. M. H.: Flow routing in mangrove forests: A field study in Trang province, Thailand, *Cont Shelf Res*, 71, 52–67, <https://doi.org/10.1016/j.csr.2013.10.002>, 2013.
- 525 Horstman, E. M., Dohmen-Janssen, C. M., Bouma, T. J., and Hulscher, S. J. M. H.: Tidal-scale flow routing and sedimentation in mangrove forests: Combining field data and numerical modelling, *Geomorphology*, 228, 244–262, <https://doi.org/10.1016/j.geomorph.2014.08.011>, 2015.
- Horstman, E. M., Bryan, K. R., and Mullarney, J. C.: Drag variations, tidal asymmetry and tidal range changes in a mangrove 530 creek system, *Earth Surface Processes and Landforms*, 1–19, <https://doi.org/10.1002/esp.5124>, 2021.
- Jane, R. A., Malagón-Santos, V., Rashid, M. M., Doebele, L., Wahl, T., Timmers, S. R., Serafin, K. A., Schmied, L., and Lindemer, C.: A Hybrid Framework for Rapidly Locating Transition Zones: A Comparison of Event- and Response-Based Return Water Levels in the Suwannee River FL, *Water Resour Res*, 58, <https://doi.org/10.1029/2022wr032481>, 2022.

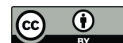

535

Kumbier, K., Carvalho, R. C., Vafeidis, A. T., and Woodroffe, C. D.: Investigating compound flooding in an estuary using hydrodynamic modelling: a case study from the Shoalhaven River, Australia, *Nat Hazard Earth Sys*, 18, 463–477, <https://doi.org/10.5194/nhess-18-463-2018>, 2018.

540

Lee, J.-Y., Marotzke, J., Bala, G., Cao, L., Corti, S., Dunne, J. P., Engelbrecht, F., Fischer, E., Fyfe, J. C., Jones, C., Maycock, A., Mutemi, J., Ndiaye, O., Panickal, S., and Zhou, T.: Future Global Climate: Scenario-Based Projections and Near-Term Information, 553–672, <https://doi.org/10.1017/9781009157896.006>, 2021.

545

Lovelock, C. E., Cahoon, D. R., Friess, D. A., Guntenspergen, G. R., Krauss, K. W., Reef, R., Rogers, K., Saunders, M. L., Sidik, F., Swales, A., Saintilan, N., Thuyen, L. X., and Triet, T.: The vulnerability of Indo-Pacific mangrove forests to sea-level rise, *Nature*, 526, 559–563, <https://doi.org/10.1038/nature15538>, 2015.

Lovelock, C. E., Feller, I. C., Reef, R., Hickey, S., and Ball, M. C.: Mangrove dieback during fluctuating sea levels, *Sci Rep-uk*, 7, 1680, <https://doi.org/10.1038/s41598-017-01927-6>, 2017.

550

Mazda, Y., Wolanski, E., King, B., Sase, A., Ohtsuka, D., and Magi, M.: Drag force due to vegetation in mangrove swamps, *Mangroves and Salt Marshes*, 1, 193–199, <https://doi.org/10.1023/a:1009949411068>, 1997.

555

Mazda, Y., Kobashi, D., and Okada, S.: Tidal-Scale Hydrodynamics within Mangrove Swamps, *Wetlands Ecology and Management*, 13, 647–655, <https://doi.org/10.1007/s11273-005-0613-4>, 2005.

McPhaden, M. J., Zebiak, S. E., and Glantz, M. H.: ENSO as an Integrating Concept in Earth Science, *Science*, 314, 1740–1745, <https://doi.org/10.1126/science.1132588>, 2006.

560

Muis, S., Verlaan, M., Winsemius, H. C., Aerts, J. C. J. H., and Ward, P. J.: A global reanalysis of storm surges and extreme sea levels, *Nat Commun*, 7, 11969, <https://doi.org/10.1038/ncomms11969>, 2016.

565

Narayan, S., Beck, M. W., Reguero, B. G., Losada, I. J., Wesenbeeck, B. van, Pontee, N., Sanchirico, J. N., Ingram, J. C., Lange, G.-M., and Burks-Copes, K. A.: The Effectiveness, Costs and Coastal Protection Benefits of Natural and Nature-Based Defences, *Plos One*, 11, e0154735, <https://doi.org/10.1371/journal.pone.0154735>, 2016.

Nash, J. E. and Sutcliffe, J. V.: River flow forecasting through conceptual models part I — A discussion of principles, *J Hydrol*, 10, 282–290, [https://doi.org/10.1016/0022-1694\(70\)90255-6](https://doi.org/10.1016/0022-1694(70)90255-6), 1970.



570 Nerem, R. S., Chambers, D. P., Leuliette, E. W., Mitchum, G. T., and Giese, B. S.: Variations in global mean sea level associated with the 1997–1998 ENSO event: Implications for measuring long term sea level change, *Geophys Res Lett*, 26, 3005–3008, <https://doi.org/10.1029/1999gl002311>, 1999.

575 Olbert, A. I., Nash, S., Cunnane, C., and Hartnett, M.: Tide–surge interactions and their effects on total sea levels in Irish coastal waters, *Ocean Dynam*, 63, 599–614, <https://doi.org/10.1007/s10236-013-0618-0>, 2013.

Olbert, A. I., Comer, J., Nash, S., and Hartnett, M.: High-resolution multi-scale modelling of coastal flooding due to tides, storm surges and rivers inflows. A Cork City example, *Coast Eng*, 121, 278–296, <https://doi.org/10.1016/j.coastaleng.2016.12.006>, 2017.

580

Pelckmans, I., Belliard, J.-P., Dominguez-Granda, L. E., Slobbe, C., Temmerman, S., and Gourgue, O.: Mangrove ecosystem properties regulate high water levels in a river delta, *EGUsphere [preprint]*, <https://doi.org/10.5194/egusphere-2023-428>, 2023.

585 Belliard, J.-P., Dominguez-Granda, L. E., Ramos-Veliz, J. A., Rosado-Moncayo, A. M., Nath, J., Govers, G., Gourgue, O., and Temmerman, S.: El Niño driven extreme sea levels in an Eastern Pacific tropical river delta: Landward amplification and shift from oceanic to fluvial forcing, *Global Planet Change*, 203, 103529, <https://doi.org/10.1016/j.gloplacha.2021.103529>, 2021.

590 Reguero, B. G., Losada, I. J., Díaz-Simal, P., Méndez, F. J., and Beck, M. W.: Effects of Climate Change on Exposure to Coastal Flooding in Latin America and the Caribbean, *Plos One*, 10, e0133409, <https://doi.org/10.1371/journal.pone.0133409>, 2015.

Richards, D. R., Thompson, B. S., and Wijedasa, L.: Quantifying net loss of global mangrove carbon stocks from 20 years of land cover change, *Nat Commun*, 11, 4260, <https://doi.org/10.1038/s41467-020-18118-z>, 2020.

595

Robins, P. E., Lewis, M. J., Freer, J., Cooper, D. M., Skinner, C. J., and Coulthard, T. J.: Improving estuary models by reducing uncertainties associated with river flows, *Estuar Coast Shelf Sci*, 207, 63–73, <https://doi.org/10.1016/j.ecss.2018.02.015>, 2018.

600 Rollenbeck, R., Orellana-Alvear, J., Bendix, J., Rodriguez, R., Pucha-Cofrep, F., Gualpa, M., Fries, A., and Célleri, R.: The Coastal El Niño Event of 2017 in Ecuador and Peru: A Weather Radar Analysis, *Remote Sens-basel*, 14, 824, <https://doi.org/10.3390/rs14040824>, 2022.



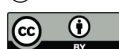

- 605 Sampurno, J., Vallaey, V., Ardianto, R., and Hanert, E.: Modeling interactions between tides, storm surges, and river discharges in the Kapuas River delta, *Biogeosciences*, 19, 2741–2757, <https://doi.org/10.5194/bg-19-2741-2022>, 2022.
- 610 Sippo, J. Z., Lovelock, C. E., Santos, I. R., Sanders, C. J., and Maher, D. T.: Mangrove mortality in a changing climate: An overview, *Estuar Coast Shelf Sci*, 215, 241–249, <https://doi.org/10.1016/j.ecss.2018.10.011>, 2018.
- 615 Smolders, S., Plancke, Y., Ides, S., Meire, P., and Temmerman, S.: Role of intertidal wetlands for tidal and storm tide attenuation along a confined estuary: a model study, *Nat Hazards Earth Syst Sci*, 15, 1659–1675, <https://doi.org/10.5194/nhess-15-1659-2015>, 2015.
- 620 Stark, J., Oyen, T., Meire, P., and Temmerman, S.: Observations of tidal and storm surge attenuation in a large tidal marsh, *Limnol Oceanogr*, 60, 1371–1381, <https://doi.org/10.1002/lno.10104>, 2015.
- 625 Su, J., Friess, D. A., and Gasparatos, A.: A meta-analysis of the ecological and economic outcomes of mangrove restoration, *Nature Communications*, 12, <https://doi.org/10.1038/s41467-021-25349-1>, 2021.
- Takahashi, K.: The atmospheric circulation associated with extreme rainfall events in Piura, Peru, during the 1997–1998 and 2002 El Niño events, *Ann Geophys*, 22, 3917–3926, <https://doi.org/10.5194/angeo-22-3917-2004>, 2004.
- 625 Tebaldi, C., Ranasinghe, R., Vousdoukas, M., Rasmussen, D. J., Vega-Westhoff, B., Kirezci, E., Kopp, R. E., Sriver, R., and Mentaschi, L.: Extreme sea levels at different global warming levels, *Nat Clim Change*, 11, 746–751, <https://doi.org/10.1038/s41558-021-01127-1>, 2021.
- 630 Temmerman, S., Meire, P., Bouma, T. J., Herman, P. M. J., Ysebaert, T., and Vriend, H. J. D.: Ecosystem-based coastal defence in the face of global change, *Nature*, 504, 79–83, <https://doi.org/10.1038/nature12859>, 2013.
- 630 Temmerman, S., Horstman, E. M., Krauss, K. W., Mullarney, J. C., Pelckmans, I., and Schoutens, K.: Marshes and Mangroves as Nature-Based Coastal Storm Buffers, *Annu Rev Mar Sci*, 15, 95–118, <https://doi.org/10.1146/annurev-marine-040422-092951>, 2023.
- Thomas, N., Lucas, R., Bunting, P., Hardy, A., Rosenqvist, A., and Simard, M.: Distribution and drivers of global mangrove forest change, 1996–2010, *Plos One*, 12, e0179302, <https://doi.org/10.1371/journal.pone.0179302>, 2017.



635

Timmermann, A., An, S.-I., Kug, J.-S., Jin, F.-F., Cai, W., Capotondi, A., Cobb, K. M., Lengaigne, M., McPhaden, M. J., Stuecker, M. F., Stein, K., Wittenberg, A. T., Yun, K.-S., Bayr, T., Chen, H.-C., Chikamoto, Y., Dewitte, B., Dommenges, D., Grothe, P., Guilyardi, E., Ham, Y.-G., Hayashi, M., Ineson, S., Kang, D., Kim, S., Kim, W., Lee, J.-Y., Li, T., Luo, J.-J., McGregor, S., Planton, Y., Power, S., Rashid, H., Ren, H.-L., Santoso, A., Takahashi, K., Todd, A., Wang, G., Wang, G., Xie, R., Yang, W.-H., Yeh, S.-W., Yoon, J., Zeller, E., and Zhang, X.: El Niño–Southern Oscillation complexity, *Nature*, 559, 535–545, <https://doi.org/10.1038/s41586-018-0252-6>, 2018.

Tobar, V. and Wyseure, G.: Seasonal rainfall patterns classification, relationship to ENSO and rainfall trends in Ecuador, *Int. J. Climatol.*, 38, 1808–1819, <https://doi.org/10.1002/joc.5297>, 2018.

645 Vousdoukas, M. I., Mentaschi, L., Voukouvalas, E., Verlaan, M., Jevrejeva, S., Jackson, L. P., and Feyen, L.: Global probabilistic projections of extreme sea levels show intensification of coastal flood hazard, *Nat Commun*, 9, 2360, <https://doi.org/10.1038/s41467-018-04692-w>, 2018.

Wahl, T., Jain, S., Bender, J., Meyers, S. D., and Luther, M. E.: Increasing risk of compound flooding from storm surge and rainfall for major US cities, *Nat Clim Change*, 5, 1093–1097, <https://doi.org/10.1038/nclimate2736>, 2015.

650 Widlansky, M. J., Timmermann, A., and Cai, W.: Future extreme sea level seesaws in the tropical Pacific, *Sci Adv*, 1, e1500560, <https://doi.org/10.1126/sciadv.1500560>, 2015.

Wu, W., Westra, S., and Leonard, M.: Estimating the probability of compound floods in estuarine regions, *Hydrol Earth Syst Sc*, 25, 2821–2841, <https://doi.org/10.5194/hess-25-2821-2021>, 2021.

655

Zheng, F., Westra, S., and Sisson, S. A.: Quantifying the dependence between extreme rainfall and storm surge in the coastal zone, *J Hydrol*, 505, 172–187, <https://doi.org/10.1016/j.jhydrol.2013.09.054>, 2013.

660
